# Supplementary material for: Influence of radiation effect on extractability of an isobutyl-BTP/ionic liquid system: quantitative analysis and identification of radiolytic products
Source: Royal Society of Chemistry journal article supplement (doi:10.1039/c4ra08308c), 2014-01-01
Supplement: c4ra08308c1.pdf [file c4ra08308c1.pdf]

## Supporting Information

### Influence of radiation effect on extractability of *isobutyl*-BTP/ionic liquid system: quantitative analysis and identification of radiolytic products

Weijin Yuan,<sup>a,‡</sup> Yinyong Ao,<sup>b,‡</sup> Long Zhao,<sup>a\*</sup> Maolin Zhai,<sup>b\*</sup> Jing Peng,<sup>b</sup> Jiuqiang Li,<sup>b</sup> and Yuezhou Wei<sup>a</sup>

<sup>a</sup> Nuclear Chemical Engineering Laboratory, School of Nuclear Science and Engineering, Shanghai Jiao Tong University, Shanghai 200240, P. R. China

<sup>b</sup> Beijing National Laboratory for Molecular Sciences, Radiochemistry and Radiation Chemistry Key Laboratory for Fundamental Science, College of Chemistry and Molecular Engineering, Peking University, Beijing 100871, China

\* Corresponding authors: Tel/Fax: +86-21-34207654, E-mail: ryuuchou@sjtu.edu.cn; Tel/Fax: +86-10-62753794, mlzhai@pku.edu.cn

‡ These authors contributed equally.

#### Page No. Contents

- S – 2** Experiment part.
- S – 4** Table S1.  $E_{Dy}$  and  $D_{Dy}$  of *isobutyl*-BTP extraction system.
- S – 5** Fig.S1 Dependence of  $E_{Dy}$  in *isobutyl*-BTP/[C<sub>2</sub>mim][NTf<sub>2</sub>] system on oscillation time.
- S – 6** Fig.S2 <sup>1</sup>H NMR spectra of *isobutyl*-BTP before and after irradiation at 500 kGy.
- S – 7** Fig. S3 Micro-FTIR spectra of unirradiated and irradiated *isobutyl*-BTP.
- S – 8** Fig. S4 UPLC/Q-TOF-MS spectra of *isobutyl*-BTP/[C<sub>2</sub>mim][NTf<sub>2</sub>] (20 mM) before and after irradiation.
- S – 9** Fig. S5 UPLC/Q-TOF-MS spectra of *isobutyl*-BTP/1-octanol (20 mM) before and after irradiation.
- S – 10** Fig. S6 Radiolysis rate of *isobutyl*-BTP in [C<sub>2</sub>mim][NTf<sub>2</sub>] and 1-octanol at different doses.

## Experiment part

**1. Extraction of Dy<sup>3+</sup>:** The extraction solution (0.5 mL) contained 20 mmol L<sup>-1</sup> *isobutyl*-BTP was prepared by dissolving *isobutyl*-BTP in [C<sub>2</sub>mim][NTf<sub>2</sub>], and the aqueous solution (0.5 mL) with various concentrations of Dy<sup>3+</sup> (abbreviated as [Dy<sup>3+</sup>]). The extraction experiments were oscillated in a constant temperature water bath at 25 °C with a rotating speed of 120 r min<sup>-1</sup>, then were centrifuged for 2 min to ensure that two phases were completely separated. After phase separation, the aqueous solution was diluted with deionized water, and then the [Dy<sup>3+</sup>] in the diluted aqueous solution was measured by Prodigy high dispersion inductively coupled plasma atomic emission spectrometer (ICPS-7510, SHIMADZU, JPN). The extraction efficiencies ( $D_{Dy}$ ) and distribution ratios ( $E_{Dy}$ ) were calculated from Eqn (1) and Eqn (2), respectively. The subscript “org/aq” is short for organic phase/aqueous phase, while the “i/f” designates the initial/final concentration of Dy<sup>3+</sup> in the diluted solution.

$$D_{Dy} = \frac{[Dy]_{org}}{[Dy]_{aq}} = \frac{[Dy]_{aq,i} - [Dy]_{aq,f}}{[Dy]_{aq,f}} \quad (1)$$

$$E_{Dy} = \frac{[Dy]_{aq,i} - [Dy]_{aq,f}}{[Dy]_{aq,i}} \quad (2)$$

**2. Quantitative analysis using UPLC-Q-TOF-MS:** An equal volume of sample was added to 2 mL acetonitrile, followed by mixing for 10 min. The supernatant was obtained by centrifugation at 12,000 rpm for 10 min and was directly used for UPLC-Q-TOF-MS (Waters Micromass Q-TOF Premier mass spectrometer). UPLC was performed at 45 °C using an Acquity UPLC BEH C<sub>18</sub> column (100 mm × 2.1mm, i.d.: 1.7 μm; Waters, Milford, USA), equipped with an Acquity UPLC VanGuard pre-column (5 mm × 2.1 mm, i.d.: 1.7 μm; Waters). The flow rate was 0.4 mL min<sup>-1</sup> and the injection volume was 2 μL. MS condition: capillary potential 3.0 kV; sampling cone potential 35.0 V; desolvation gas flow 600.0 L h<sup>-1</sup>; collision energy 6.0 eV; scan range m/z 100-2000; scan time 0.3 s; inter-scan time 0.02 s. Calibrations were performed using the standards at a series of initial concentration of the *isobutyl*-BTP dissolved in [C<sub>2</sub>mim][NTf<sub>2</sub>] and 1-octanol.

**3. MALDI-FTMS:** Matrix Assisted Laser Desorption Ionization/ Fourier Transform Mass spectrometry (MALDI-FTMS) measurements were recorded in positive mode. Experiments were conducted using a 7.0 T SolariX FTMS system equipped with a dual ESI-MALDI

source (Bruker Daltonics). The intensity of MALDI-laser irradiation was 15% with frequency at 1000 Hz. The sample was diluted with acetonitrile by 5 times, 100 mg mL<sup>-1</sup> of 2,5-dihydroxybenzoic acid matrix was prepared in 50% acetonitrile in water (0.1% Trifluoroacetic acid), and mixed at the ratio of 3:1 with sample, 1 µL of mixture was deposited on the stainless steel target and dried to produce a thin film of homogeneous crystals. The mass range (m/z) was set from 80 to 1000.

Table S1.  $E_{Dy}$  and  $D_{Dy}$  of *isobutyl*-BTP extraction system

| Dose<br>(kGy) | (a) <i>isobutyl</i> -BTP at solid |          | (b) <i>isobutyl</i> -BTP<br>in [C <sub>2</sub> mim][NTf <sub>2</sub> ] |          | (c) <i>isobutyl</i> -BTP<br>in 1-octanol |          |
|---------------|-----------------------------------|----------|------------------------------------------------------------------------|----------|------------------------------------------|----------|
|               | $E_{Dy}$ (%)                      | $D_{Dy}$ | $E_{Dy}$ (%)                                                           | $D_{Dy}$ | $E_{Dy}$ (%)                             | $D_{Dy}$ |
| 0             | 83.0                              | 4.9      | 83.0                                                                   | 4.9      | 64.9                                     | 2.4      |
| 100           | 75.1                              | 3.0      | 73.5                                                                   | 2.7      | 56.7                                     | 1.3      |
| 200           | 76.4                              | 3.4      | 68.1                                                                   | 2.1      | 34.2                                     | 0.5      |
| 300           | 80.5                              | 4.4      | 57.3                                                                   | 1.3      | 10.9                                     | 0.12     |
| 400           | 79.5                              | 4.3      | 38.1                                                                   | 0.6      | 2.1                                      | 0.02     |
| 500           | 78.6                              | 4.1      | 26.8                                                                   | 0.4      | 0.0                                      | 0.0      |

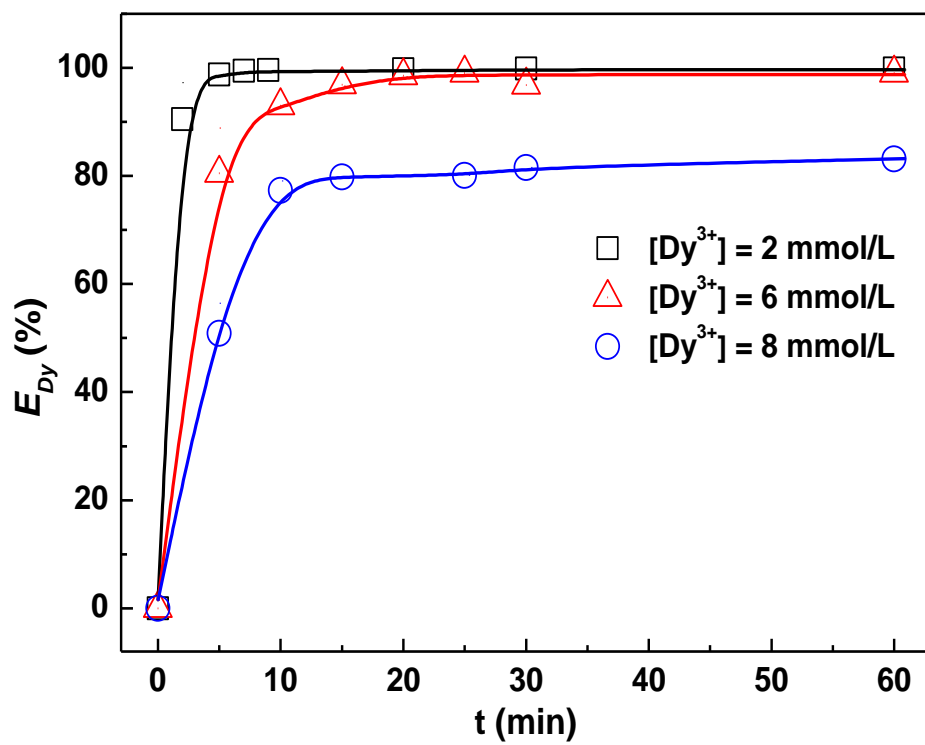

Fig.S1 Dependence of  $E_{Dy}$  in *isobutyl*-BTP/[C<sub>2</sub>mim][NTf<sub>2</sub>] system on oscillation time.

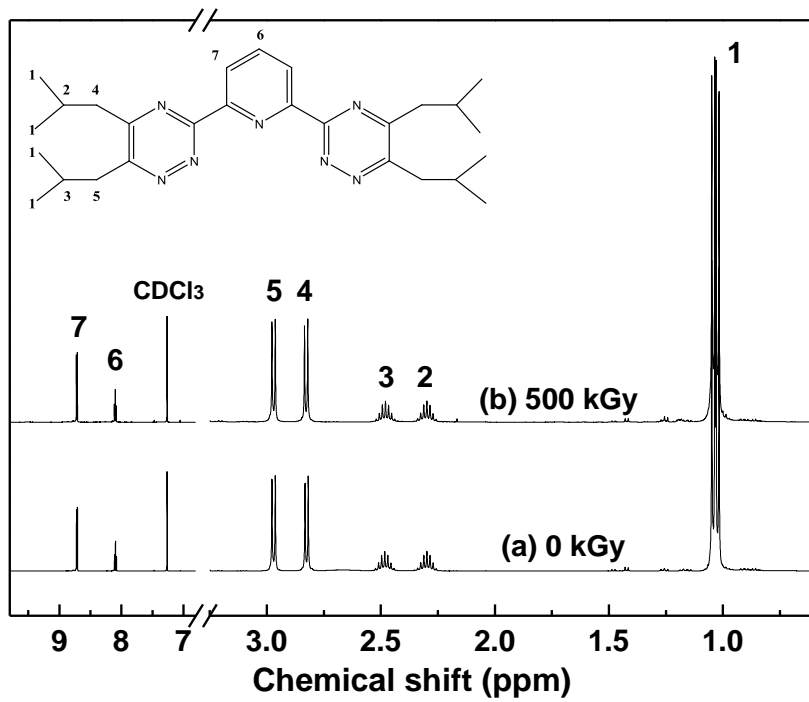

Fig.S2 <sup>1</sup>H NMR spectra of *isobutyl*-BTP before and after irradiation at 500 kGy.

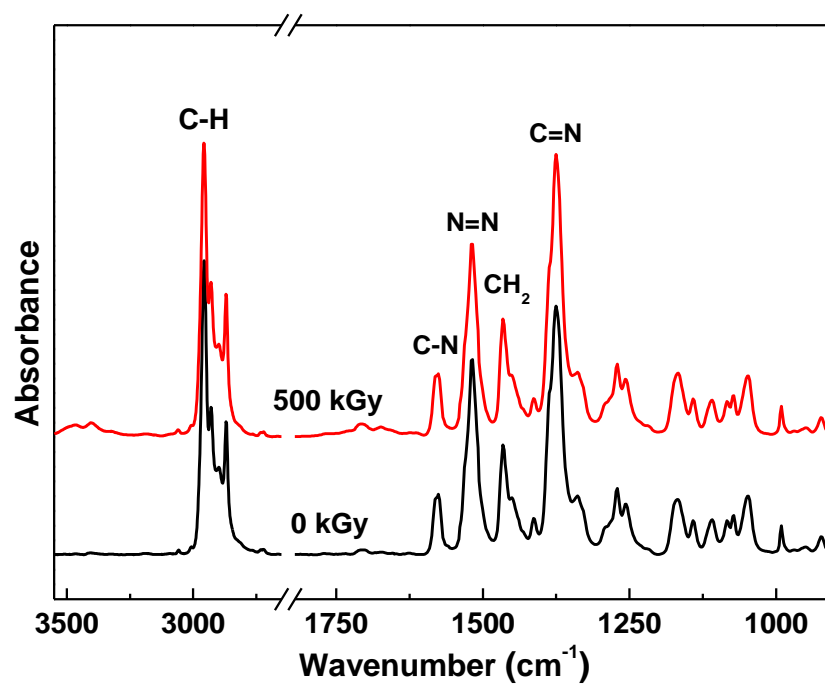

Fig.S3 Micro-FTIR spectra of unirradiated and irradiated *isobutyl*-BTP.

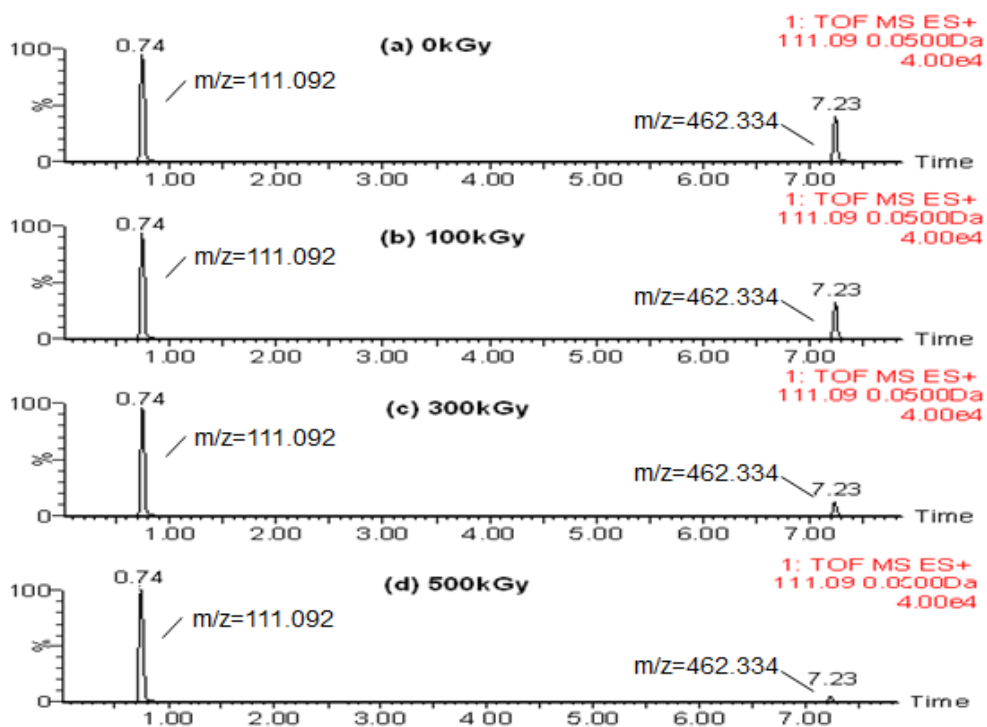

Fig.S4 UPLC/Q-TOF-MS spectra of *isobutyl*-BTP/[C<sub>2</sub>mim][NTf<sub>2</sub>] (20 mM) before and after irradiation ((a): 0 kGy, (b):100 kGy, (c):300 kGy, (d):500 kGy).



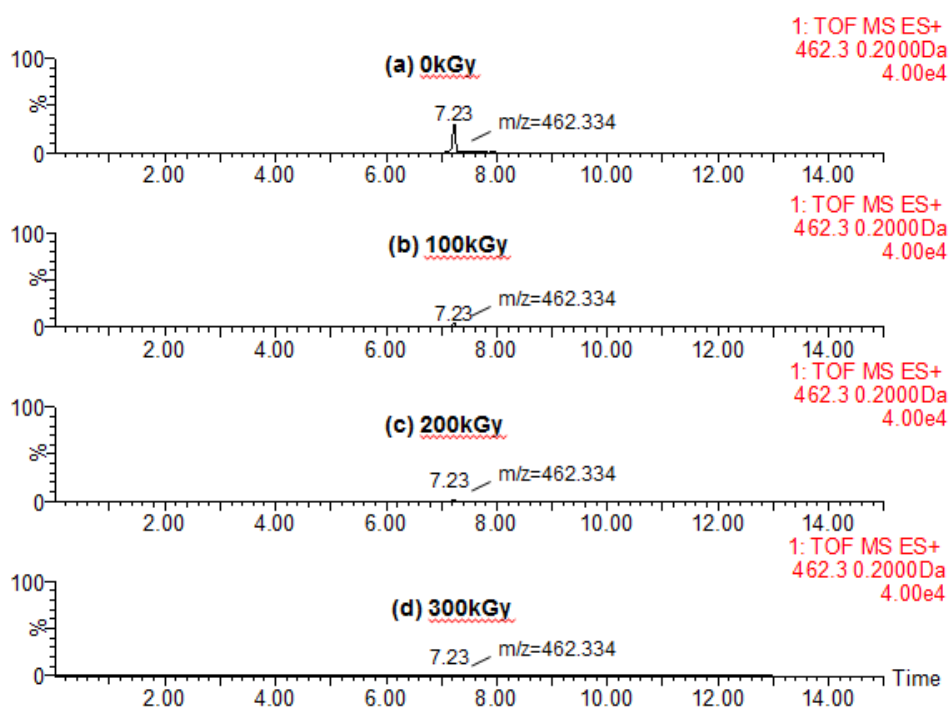

Fig.S5 UPLC/Q-TOF-MS spectra of *isobutyl-BTP/1-octanol* (20 mM) before and after irradiation ((a): 0kGy, (b):100kGy, (c):200kGy, (d):300kGy).

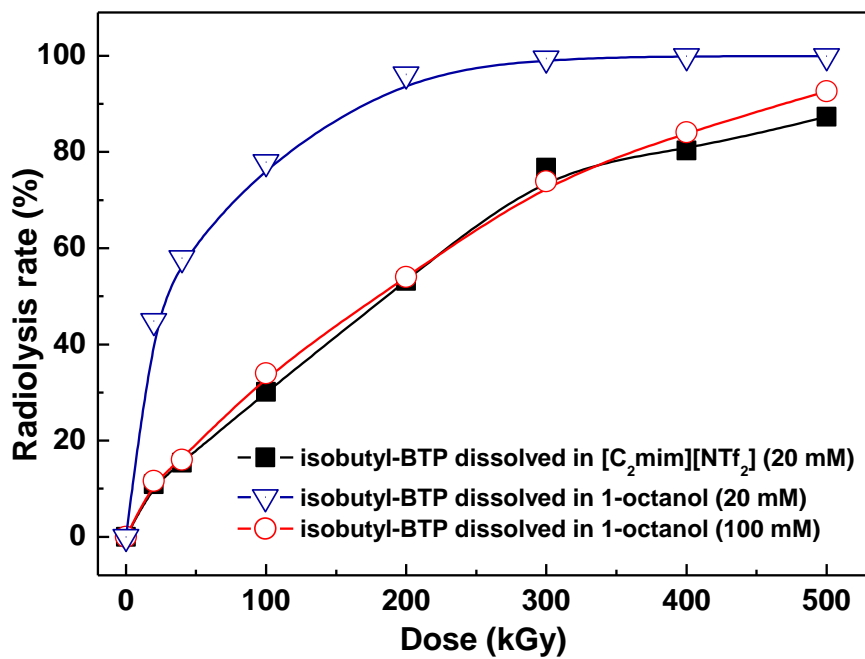

Fig.S6 Radiolysis rate of *isobutyl*-BTP in [C<sub>2</sub>mim][NTf<sub>2</sub>] and 1-octanol at different doses.
